# Supplementary material for: Pain after earthquake
Source: PubMed Central journal article supplement (PMC3439252; doi:10.1186/1757-7241-20-43), 2012-06-29
Supplement: 1757-7241-20-43-S2.pdf [file 1757-7241-20-43-S2.pdf]

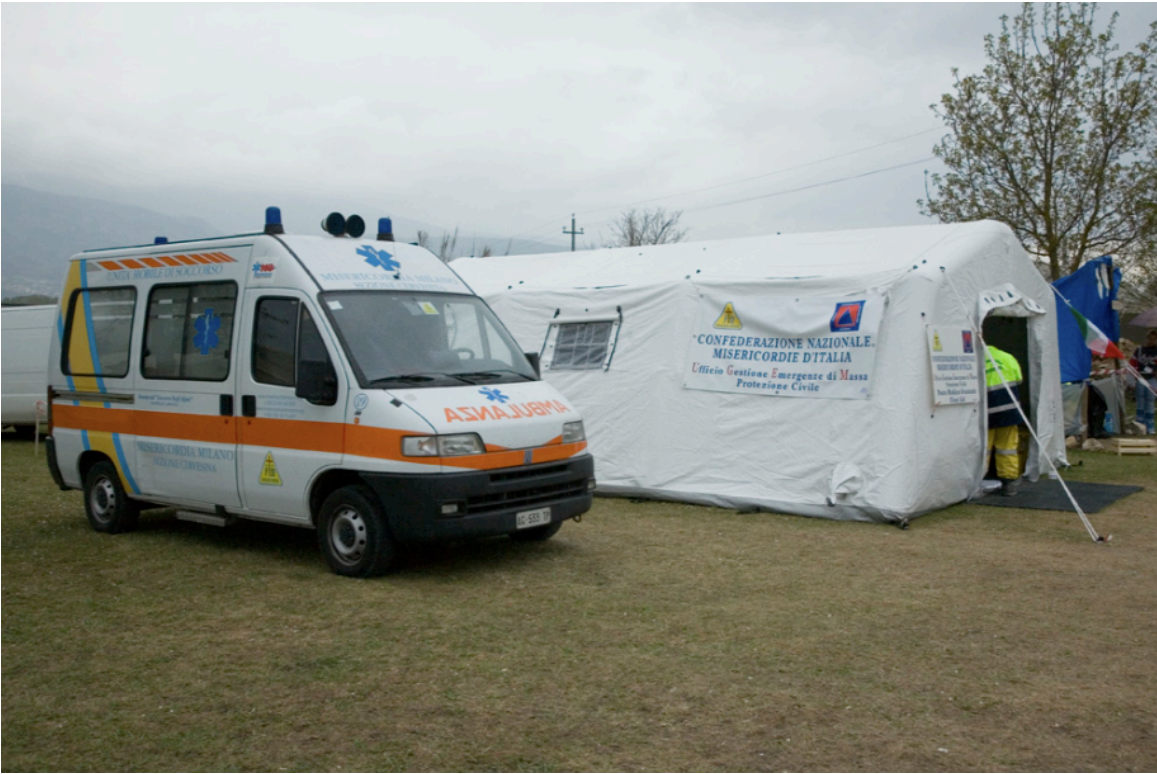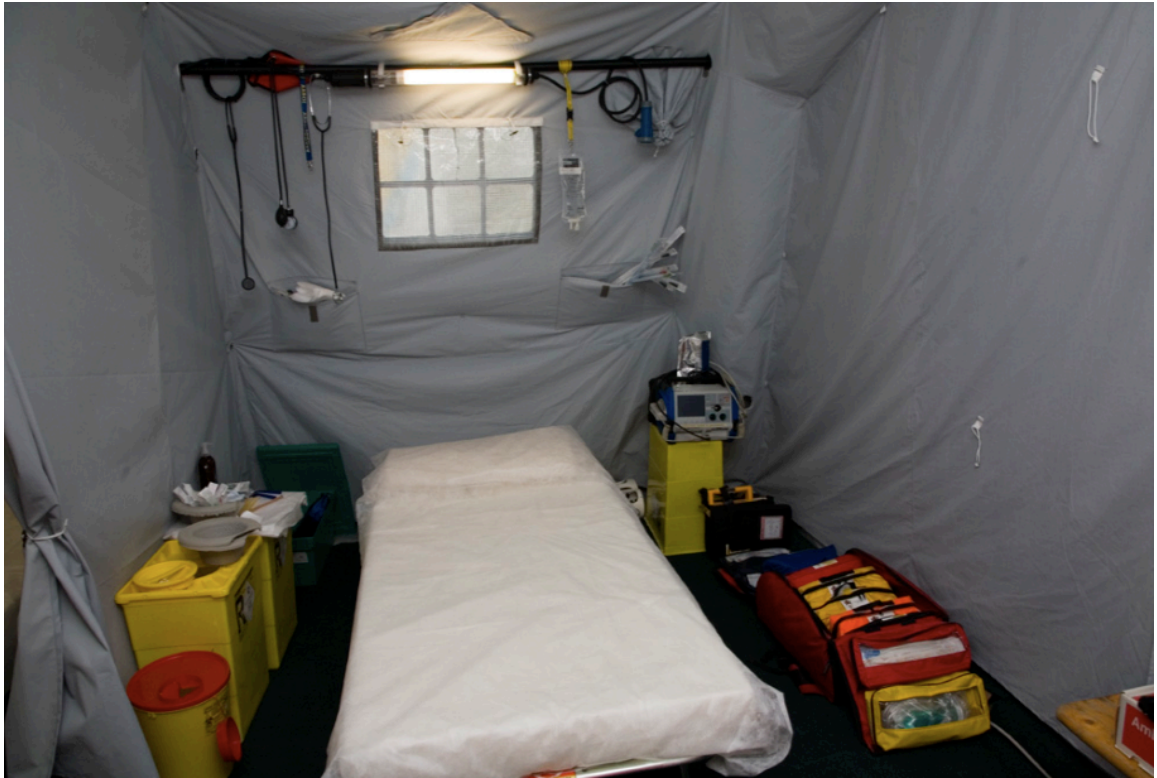

AMP site in Onna tent camp a light, pneumatic tent-type structure.

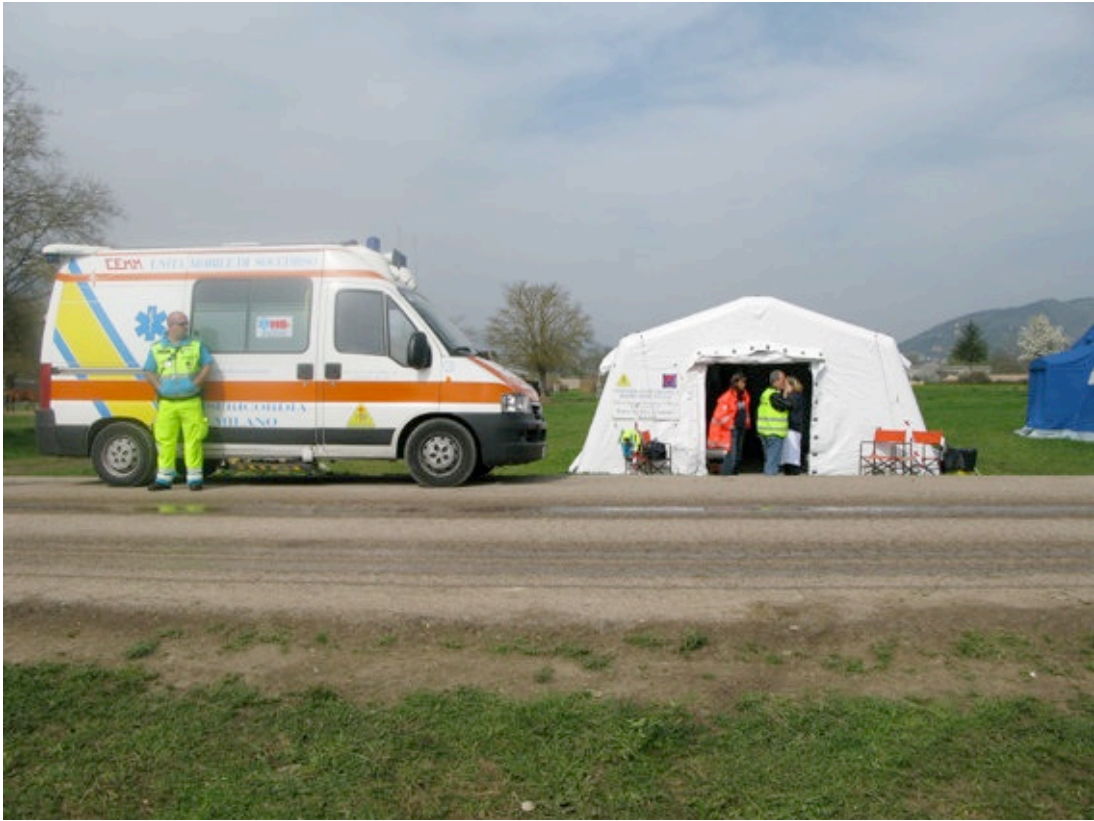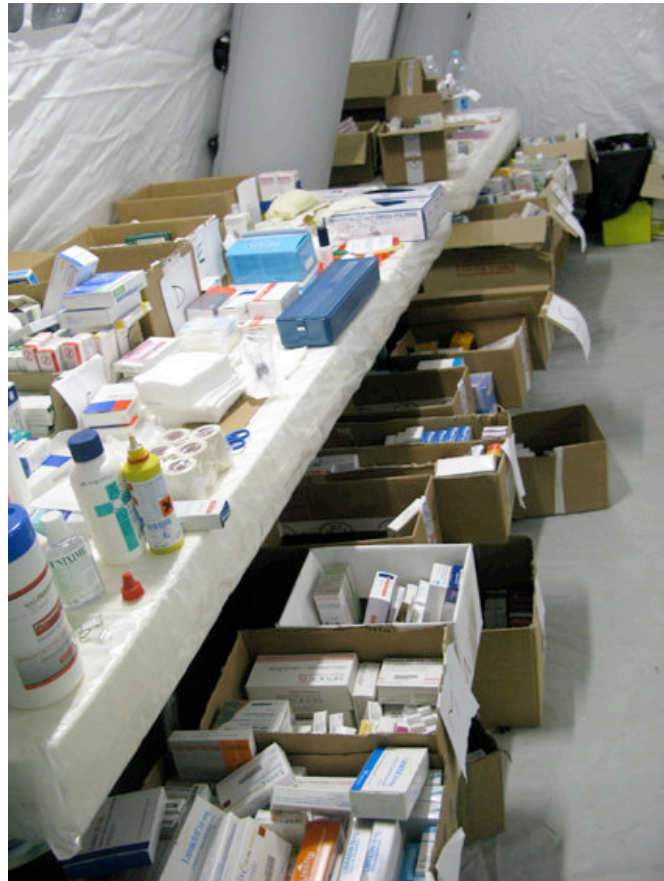

AMP of Onna tent camp, drugs storage inside advanced medical presidium (AMP).



Pain & Earthquake

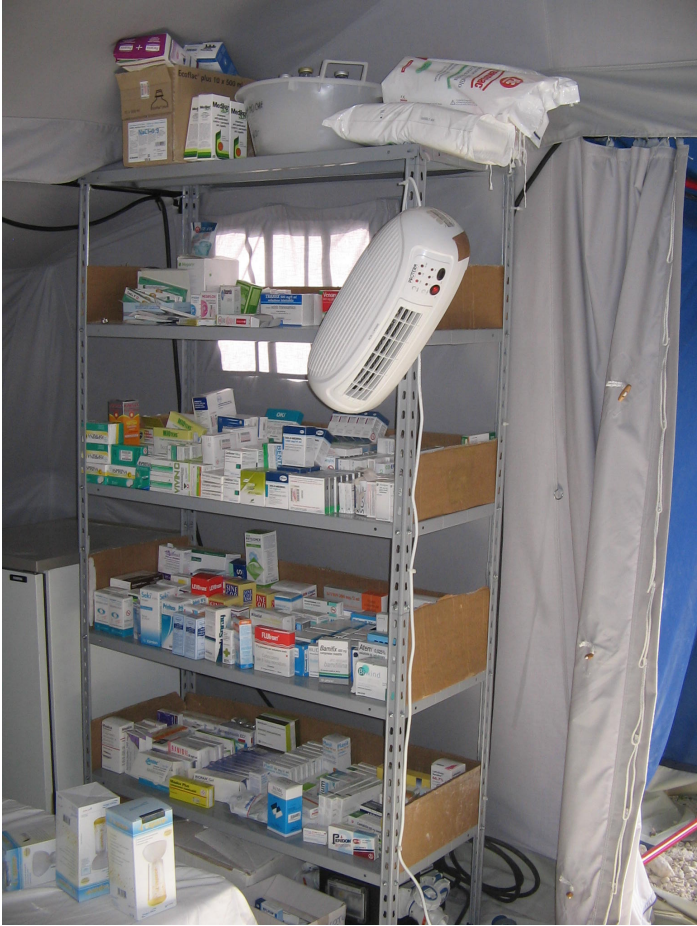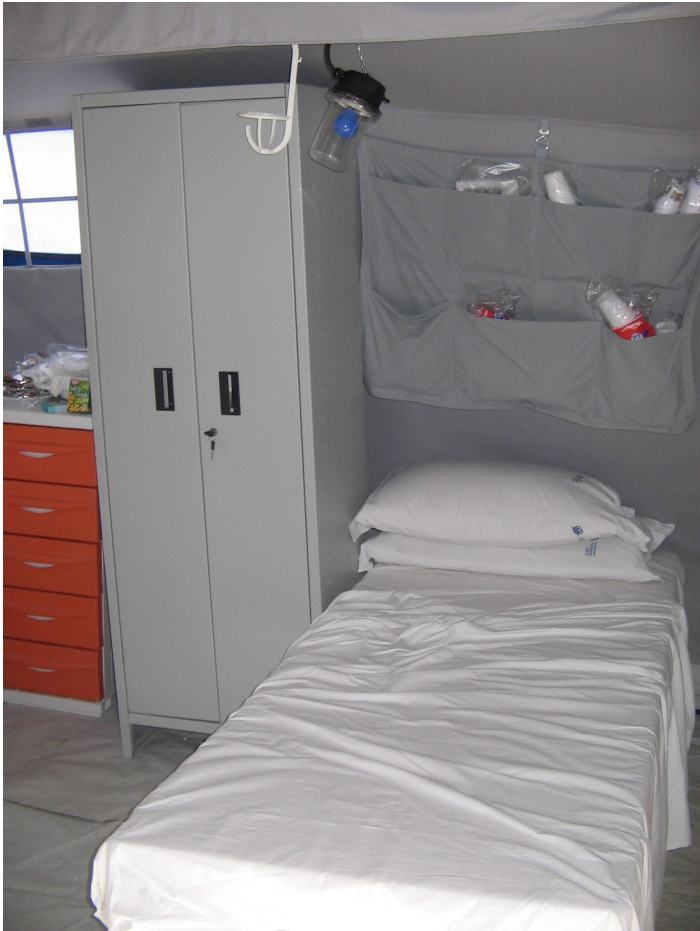

AMP of San Biagio-Tempera.
