# Supplementary material for: Pain after earthquake
Source: PubMed Central journal article supplement (PMC3439252; doi:10.1186/1757-7241-20-43), 2012-06-29
Supplement: 1757-7241-20-43-S3.pdf [file 1757-7241-20-43-S3.pdf]

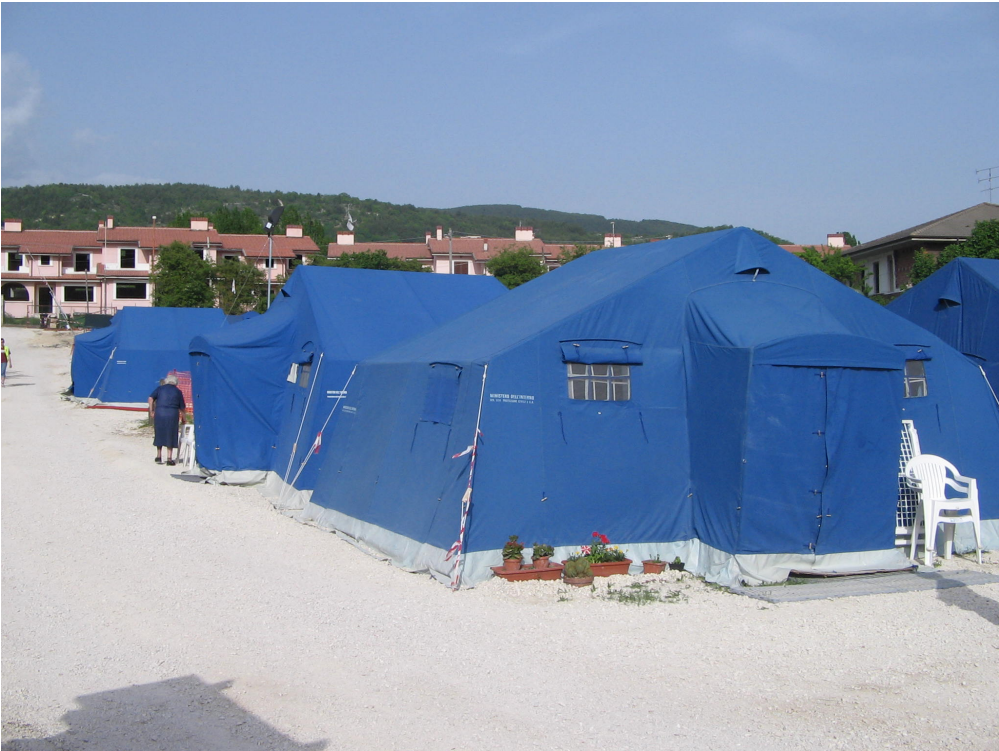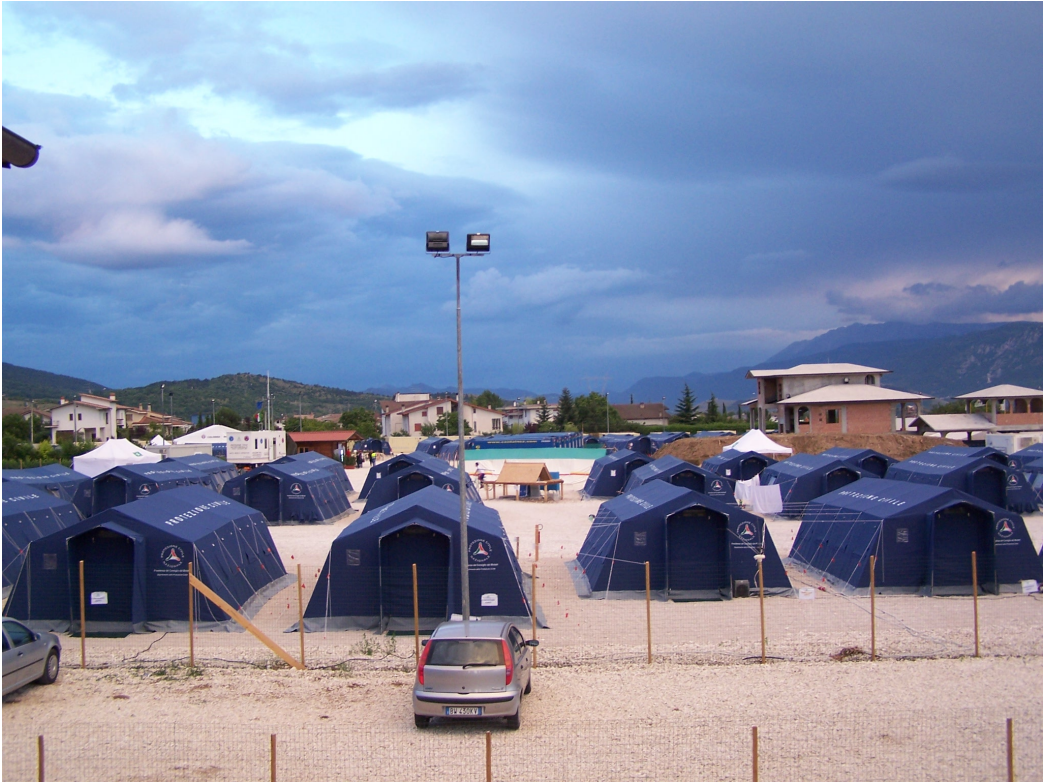

Tent camp of Tempera.



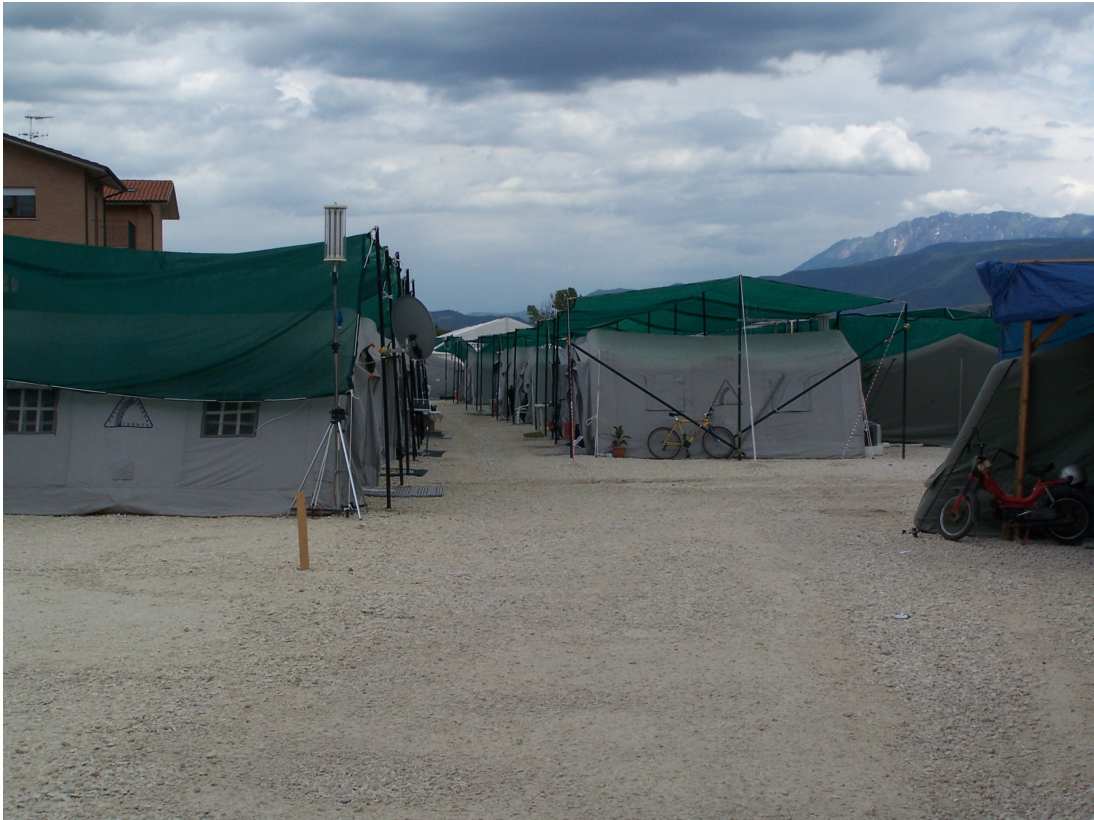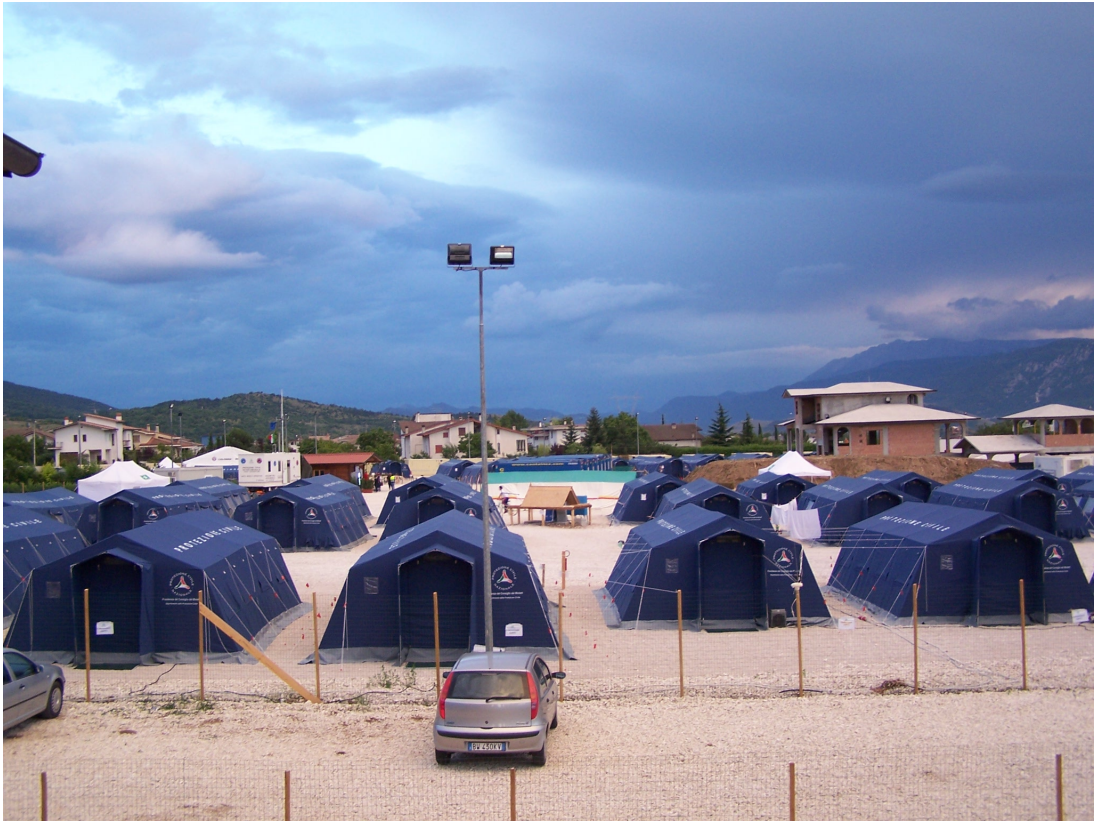

Tent camps of Paganica and Tempera.

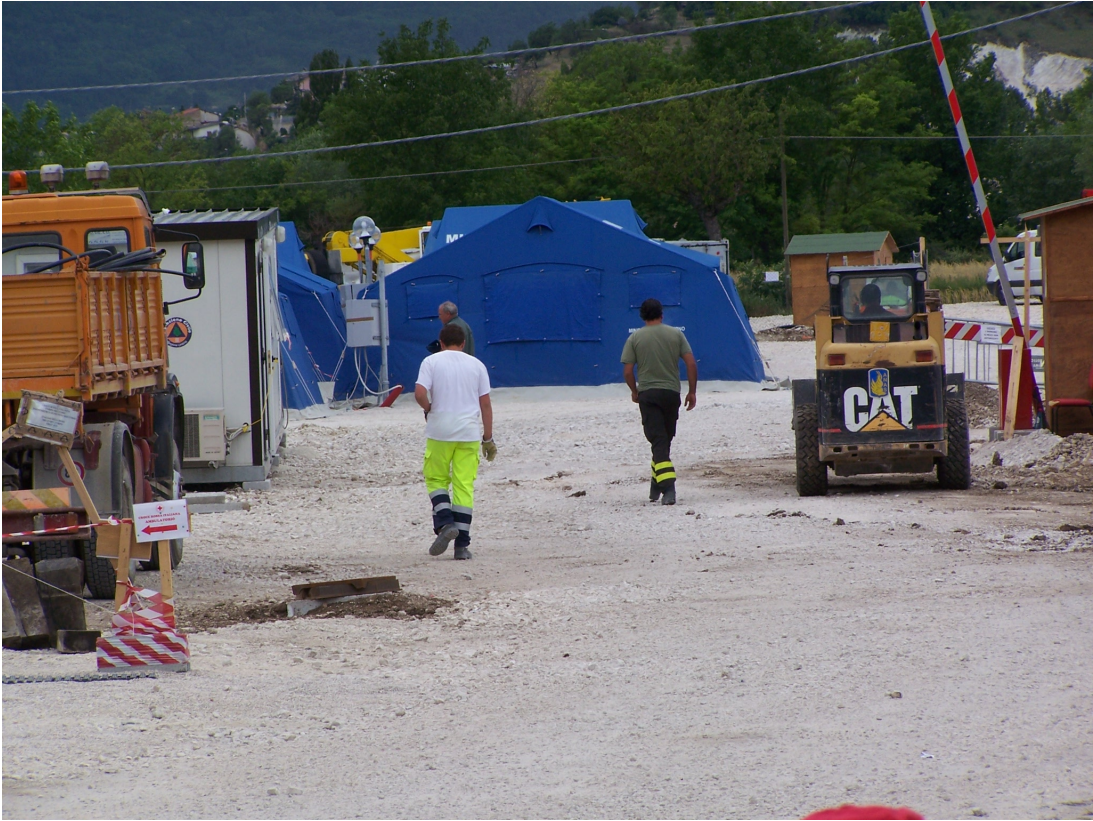

Volunteers at work in tent camp.
